# Supplementary material for: Water Quality Evaluation and Pollution Source Apportionment of Surface Water in a Major City in Southeast China Using Multi-Statistical Analyses and Machine Learning Models
Source: MDPI journal article supplement (doi:10.3390/ijerph20010881), 2023-01-03
Supplement: s1 [file s1]

## Supplementary Materials

# Water quality evaluation and pollution source apportionment of surface water in a major city in southeast China using multi-statistical analyses and machine learning models

Yu Zhou<sup>1</sup>, Xinmin Wang<sup>1</sup>, Weiyang Li<sup>2,3,\*</sup>, Shuyun Zhou<sup>4</sup> and Laizhu Jiang<sup>5</sup>

<sup>1</sup> College of Environmental Science and Engineering, Tongji University, Shanghai, 200092, China;

<sup>2</sup> State Key Laboratory of Pollution Control and Resource Reuse, Tongji University, Shanghai, 200092, China;

<sup>3</sup> Ministry of Education Key Laboratory of Yangtze River Water Environment, Tongji University, Shanghai, 200092, China;

<sup>4</sup> Jiangsu Yinyang Stainless Steel Pipe Co., Ltd;

<sup>5</sup> Fujian Qingtuo Special Steel Technology Research Co., Ltd;

\* Correspondence: 123lwyktz@tongji.edu.cn; Tel.: 18017982085

Table S1. Water quality characteristic

| Parameters                           | Site | N   | Max   | Min  | Mean  | SD   | CV     | National surface water quality standard (GB 3838-2002) |      |     |     |     | Exceeding<br>standard III<br>rate (%) |
|--------------------------------------|------|-----|-------|------|-------|------|--------|--------------------------------------------------------|------|-----|-----|-----|---------------------------------------|
|                                      |      |     |       |      |       |      |        | I                                                      | II   | III | IV  | V   |                                       |
| WT (°C)                              | FWP  | 44  | 28.1  | 11.8 | 21.59 | 3.93 | 18.18  |                                                        |      |     |     |     | /                                     |
|                                      | WWP  | 119 | 29    | 11.5 | 21.46 | 4.53 | 21.13  |                                                        |      |     |     |     | /                                     |
|                                      | SWP  | 97  | 30.6  | 11.1 | 21.58 | 4.87 | 22.59  |                                                        |      |     |     |     | /                                     |
|                                      | CWP  | 119 | 30.4  | 11.1 | 21.71 | 4.79 | 22.08  |                                                        |      |     |     |     | /                                     |
| TP (mg/L)                            | FWP  | 44  | 0.08  | 0.01 | 0.02  | 0.02 | 74.11  |                                                        |      |     |     |     | 0                                     |
|                                      | WWP  | 119 | 0.2   | 0.01 | 0.03  | 0.03 | 106.41 | ≤                                                      | 0.02 | 0.1 | 0.2 | 0.3 | 0                                     |
|                                      | SWP  | 97  | 0.31  | 0.01 | 0.05  | 0.04 | 92.22  |                                                        |      |     |     | 0.4 | 0                                     |
|                                      | CWP  | 119 | 0.14  | 0.01 | 0.04  | 0.03 | 84.12  |                                                        |      |     |     |     | 1.02                                  |
| TN (mg/L)                            | FWP  | 44  | 2.19  | 0.49 | 1.42  | 0.45 | 31.4   |                                                        |      |     |     |     | 82.35                                 |
|                                      | WWP  | 119 | 3.36  | 0.14 | 1.53  | 0.58 | 37.73  | ≤                                                      | 0.2  | 0.5 | 1   | 1.5 | 77.27                                 |
|                                      | SWP  | 97  | 4.76  | 0.2  | 1.64  | 0.78 | 47.54  |                                                        |      |     |     | 2   | 89.92                                 |
|                                      | CWP  | 119 | 3.48  | 0.26 | 1.64  | 0.57 | 34.94  |                                                        |      |     |     |     | 75.64                                 |
| SO <sub>4</sub> <sup>2-</sup> (mg/L) | FWP  | 44  | 28.5  | 2.99 | 14    | 6.48 | 46.32  |                                                        |      |     |     |     | 0                                     |
|                                      | WWP  | 119 | 27.2  | 4.95 | 13.05 | 4.84 | 37.07  | ≤                                                      |      |     | 250 |     | 0                                     |
|                                      | SWP  | 97  | 20.37 | 2.99 | 9.24  | 4.38 | 47.35  |                                                        |      |     |     |     | 0                                     |
|                                      | CWP  | 119 | 56    | 2.76 | 14.1  | 7.52 | 53.36  |                                                        |      |     |     |     | 0                                     |
| pH                                   | FWP  | 44  | 7.49  | 6.58 | 6.97  | 0.19 | 2.68   |                                                        |      |     |     |     | 0                                     |
|                                      | WWP  | 119 | 7.37  | 6.53 | 6.92  | 0.17 | 2.47   |                                                        |      |     |     |     | 0                                     |
|                                      | SWP  | 97  | 7.33  | 6.58 | 6.93  | 0.14 | 2.08   |                                                        |      |     | 6~9 |     | 0                                     |
|                                      | CWP  | 119 | 7.6   | 6.5  | 7.01  | 0.2  | 2.91   |                                                        |      |     |     |     | 0                                     |
| NO <sub>3</sub> <sup>-</sup> (mg/L)  | FWP  | 44  | 2.37  | 0.5  | 1.33  | 0.41 | 30.97  |                                                        |      |     |     |     | 0                                     |
|                                      | WWP  | 119 | 3.55  | 0.74 | 1.6   | 0.46 | 29.15  | ≤                                                      |      |     | 10  |     | 0                                     |
|                                      | SWP  | 97  | 4.07  | 0.55 | 1.6   | 0.6  | 37.21  |                                                        |      |     |     |     | 0                                     |
|                                      | CWP  | 119 | 3.38  | 0.66 | 1.61  | 0.5  | 31.24  |                                                        |      |     |     |     | 0                                     |
| Mn (mg/L)                            | FWP  | 44  | 0.13  | 0    | 0.05  | 0.04 | 70.04  | ≤                                                      |      |     | 0.1 |     | 6.72                                  |

| Parameters               | Site | N   | Max    | Min  | Mean  | SD    | CV     | National surface water quality standard (GB 3838-2002) |     |      |       |       | Exceeding<br>standard III<br>rate (%) |       |
|--------------------------|------|-----|--------|------|-------|-------|--------|--------------------------------------------------------|-----|------|-------|-------|---------------------------------------|-------|
|                          |      |     |        |      |       |       |        | I                                                      | II  | III  | IV    | V     |                                       |       |
|                          | WWP  | 119 | 0.16   | 0    | 0.06  | 0.03  | 47.42  |                                                        |     |      |       |       | 11.36                                 |       |
|                          | SWP  | 97  | 1.52   | 0    | 0.09  | 0.16  | 82.77  |                                                        |     |      |       |       | 44.54                                 |       |
|                          | CWP  | 119 | 0.55   | 0    | 0.12  | 0.09  | 80.38  |                                                        |     |      |       |       | 23.08                                 |       |
|                          |      |     |        |      |       |       |        |                                                        |     |      |       |       |                                       |       |
| Fe (mg/L)                | FWP  | 44  | 1.37   | 0.01 | 0.26  | 0.21  | 81.87  |                                                        |     |      |       |       | 21.01                                 |       |
|                          | WWP  | 119 | 1.26   | 0    | 0.28  | 0.14  | 50.96  | ≤                                                      |     |      | 0.3   |       | 11.36                                 |       |
|                          | SWP  | 97  | 2.63   | 0    | 0.37  | 0.32  | 88.36  |                                                        |     |      |       |       | 44.54                                 |       |
|                          | CWP  | 119 | 3.2    | 0.01 | 0.76  | 0.56  | 73.93  |                                                        |     |      |       |       | 23.08                                 |       |
|                          |      |     |        |      |       |       |        |                                                        |     |      |       |       |                                       |       |
| F.coli (colonies/L)      | FWP  | 44  | 32000  | 210  | 4576  | 6527  | 142.64 |                                                        |     |      |       |       | 21.01                                 |       |
|                          | WWP  | 119 | 65000  | 600  | 7553  | 8909  | 117.94 | ≤                                                      | 200 | 2000 | 10000 | 20000 | 40000                                 | 9.09  |
|                          | SWP  | 97  | 160000 | 10   | 22031 | 24295 | 110.28 |                                                        |     |      |       |       |                                       | 51.26 |
|                          | CWP  | 119 | 92000  | 100  | 14115 | 13107 | 92.86  |                                                        |     |      |       |       |                                       | 53.85 |
|                          |      |     |        |      |       |       |        |                                                        |     |      |       |       |                                       |       |
| F <sup>-</sup> (mg/L)    | FWP  | 44  | 0.38   | 0.13 | 0.23  | 0.06  | 24.84  |                                                        |     |      |       |       | 0                                     |       |
|                          | WWP  | 119 | 0.43   | 0.14 | 0.25  | 0.06  | 23.3   | ≤                                                      | 1   | 1    | 1     | 1.5   | 1.5                                   | 0     |
|                          | SWP  | 82  | 0.48   | 0.1  | 0.22  | 0.08  | 36.77  |                                                        |     |      |       |       |                                       | 0     |
|                          | CWP  | 119 | 0.45   | 0.03 | 0.26  | 0.07  | 26.18  |                                                        |     |      |       |       |                                       | 0     |
|                          |      |     |        |      |       |       |        |                                                        |     |      |       |       |                                       |       |
| DO (mg/L)                | FWP  | 44  | 9.92   | 4.2  | 7.19  | 1.2   | 16.7   |                                                        |     |      |       |       | 3.36                                  |       |
|                          | WWP  | 119 | 10.7   | 3.39 | 7.42  | 1.41  | 19.06  | ≥                                                      | 7.5 | 6    | 5     | 3     | 2                                     | 2.27  |
|                          | SWP  | 82  | 10.8   | 3.65 | 6.77  | 1.6   | 23.69  |                                                        |     |      |       |       |                                       | 5.04  |
|                          | CWP  | 119 | 10.5   | 3.51 | 7.21  | 1.34  | 18.55  |                                                        |     |      |       |       |                                       | 10.26 |
|                          |      |     |        |      |       |       |        |                                                        |     |      |       |       |                                       |       |
| COD <sub>Mn</sub> (mg/L) | FWP  | 44  | 4.38   | 1.01 | 1.75  | 0.61  | 34.92  |                                                        |     |      |       |       | 0                                     |       |
|                          | WWP  | 119 | 3.58   | 0.64 | 1.79  | 0.53  | 29.52  | ≤                                                      | 2   | 4    | 6     | 10    | 15                                    | 0     |
|                          | SWP  | 82  | 3.58   | 0.4  | 2.03  | 0.69  | 34.04  |                                                        |     |      |       |       |                                       | 0.84  |
|                          | CWP  | 119 | 7.75   | 0.56 | 2.13  | 0.79  | 36.96  |                                                        |     |      |       |       |                                       | 0     |
|                          |      |     |        |      |       |       |        |                                                        |     |      |       |       |                                       |       |
| Cl <sup>-</sup> (mg/L)   | FWP  | 44  | 11.5   | 1.46 | 5.09  | 2.36  | 46.42  |                                                        |     |      |       |       | 0                                     |       |
|                          | WWP  | 119 | 11.2   | 1.6  | 5.53  | 2.04  | 36.87  | ≤                                                      |     |      | 250   |       | 0                                     |       |
|                          | SWP  | 82  | 12.58  | 1.89 | 5.14  | 2.49  | 48.43  |                                                        |     |      |       |       | 0.84                                  |       |
|                          | CWP  | 119 | 253    | 1.82 | 13.77 | 31.44 | 228.23 |                                                        |     |      |       |       | 0                                     |       |
|                          |      |     |        |      |       |       |        |                                                        |     |      |       |       |                                       |       |

| Parameters                | Site | N   | Max  | Min  | Mean | SD   | CV     | National surface water quality standard (GB 3838-2002) |      |     |    |     | Exceeding<br>standard III<br>rate (%) |   |
|---------------------------|------|-----|------|------|------|------|--------|--------------------------------------------------------|------|-----|----|-----|---------------------------------------|---|
|                           |      |     |      |      |      |      |        | I                                                      | II   | III | IV | V   |                                       |   |
| NH <sub>3</sub> -N (mg/L) | FWP  | 44  | 0.16 | 0.02 | 0.04 | 0.04 | 94.56  | ≤                                                      | 0.15 | 0.5 | 1  | 1.5 | 2                                     | 0 |
|                           | WWP  | 119 | 0.57 | 0.02 | 0.09 | 0.1  | 121.01 |                                                        |      |     |    |     |                                       | 0 |
|                           | SWP  | 82  | 0.45 | 0.02 | 0.1  | 0.1  | 107.85 |                                                        |      |     |    |     |                                       | 0 |
|                           | CWP  | 119 | 0.57 | 0.02 | 0.13 | 0.13 | 97.18  |                                                        |      |     |    |     |                                       | 0 |

N number of samples, SD standard deviation, CV coefficient of variation

**Table S2.** Weights and normalization factors of the parameters used in the calculation of the water

| Abbreviation                    | Units      | Relative weight (pi) | Normalization factor (Ci) |       |        |       |        |       |        |        |        |         |         |
|---------------------------------|------------|----------------------|---------------------------|-------|--------|-------|--------|-------|--------|--------|--------|---------|---------|
|                                 |            |                      | 100                       | 90    | 80     | 70    | 60     | 50    | 40     | 30     | 20     | 10      | 0       |
| T                               | °C         | 1                    | 22/15                     | 24/14 | 26/12  | 28/10 | 30/5   | 32/0  | 36/-2  | 40/-4  | 45/-6  | >45/<-6 | >45/<-6 |
| pH                              |            | 1                    | 7                         | 7-8   | 7-8.5  | 7-9   | 6.5-7  | 6-9.5 | 5-10   | 4-11   | 3-12   | 2-13    | 1-14    |
| DO                              | mg/L       | 4                    | ≥7.5                      | >7    | >6.5   | >6    | >5     | >4    | >3.5   | >3     | >2     | ≥1      | <1      |
| TN <sub>a</sub>                 | mg/L       | 2                    | <0.1                      | <0.2  | <0.35  | <0.5  | <0.75  | <1    | <1.25  | <1.5   | <1.75  | ≤2      | >2      |
| NH <sub>4</sub> -N              | mg/L       | 3                    | <0.01                     | <0.05 | <0.1   | <0.2  | <0.3   | <0.4  | <0.5   | <0.75  | <1     | ≤1.25   | >1.25   |
| NO <sub>3</sub> -N <sub>b</sub> | mg/L       | 2                    | <0.5                      | <2    | <4     | <6    | <8     | <10   | <15    | <20    | <50    | ≤100    | >100    |
| TP <sub>a</sub>                 | mg/L       | 1                    | <0.01                     | <0.02 | <0.05  | <0.1  | <0.15  | <0.2  | <0.25  | <0.3   | <0.35  | ≤0.4    | >1.00   |
| COD <sub>Mnc</sub>              | mg/L       | 3                    | <1                        | <2    | <3     | <4    | <6     | <8    | <10    | <12    | <14    | ≤15     | >15     |
| Cl <sup>-</sup>                 | mg/L       | 1                    | <25                       | <50   | <100   | <150  | <200   | <300  | <500   | <700   | <1000  | ≤1500   | >1500   |
| SO <sub>4</sub> <sup>2-</sup>   | mg/L       | 2                    | <25                       | <50   | <75    | <100  | <150   | <250  | <400   | <600   | <1000  | ≤1500   | >1500   |
| <i>F.coli</i>                   | colonies/L | 3                    | <50                       | <100  | <200   | <1000 | <2000  | <6000 | <10000 | <15000 | <20000 | ≤400000 | >40000  |
| Fe                              | mg/L       | 3                    | <0.03                     | <0.06 | <0.10  | <0.2  | <0.3   | <0.4  | <0.5   | <0.75  | <1     | ≤1.5    | >1.5    |
| Mn                              | mg/L       | 3                    | <0.01                     | <0.02 | <0.035 | <0.05 | <0.075 | <0.1  | <0.125 | <0.15  | <0.2   | ≤0.3    | >0.3    |
| F <sup>-</sup>                  | mg/L       | 2                    | <0.1                      | <0.2  | <0.35  | <0.5  | <0.75  | <1    | <1.25  | <1.5   | <1.75  | ≤2      | >2      |

Adopted from Koçer and Sevgili[1], Wu et al.[2], Nong et al.[3], and Pak et al. [4]

**Table S3.** The parameter selection results of the  $WQI_{LRmin}$  models from the stepwise multiple linear regression

| Parameters                         | R <sup>2</sup> | MSE    | MAE   | MAPE/% |
|------------------------------------|----------------|--------|-------|--------|
| Mn                                 | 0.583          | 16.919 | 3.391 | 4.802  |
| Mn + Fe                            | 0.677          | 14.135 | 3.047 | 4.317  |
| Mn + Fe + <i>F. coli</i>           | 0.766          | 9.500  | 2.448 | 3.499  |
| Mn + Fe + <i>F. coli</i> + DO      | 0.865          | 5.496  | 1.868 | 2.715  |
| Mn + Fe + <i>F. coli</i> + DO + TN | 0.905          | 2.527  | 1.232 | 1.728  |

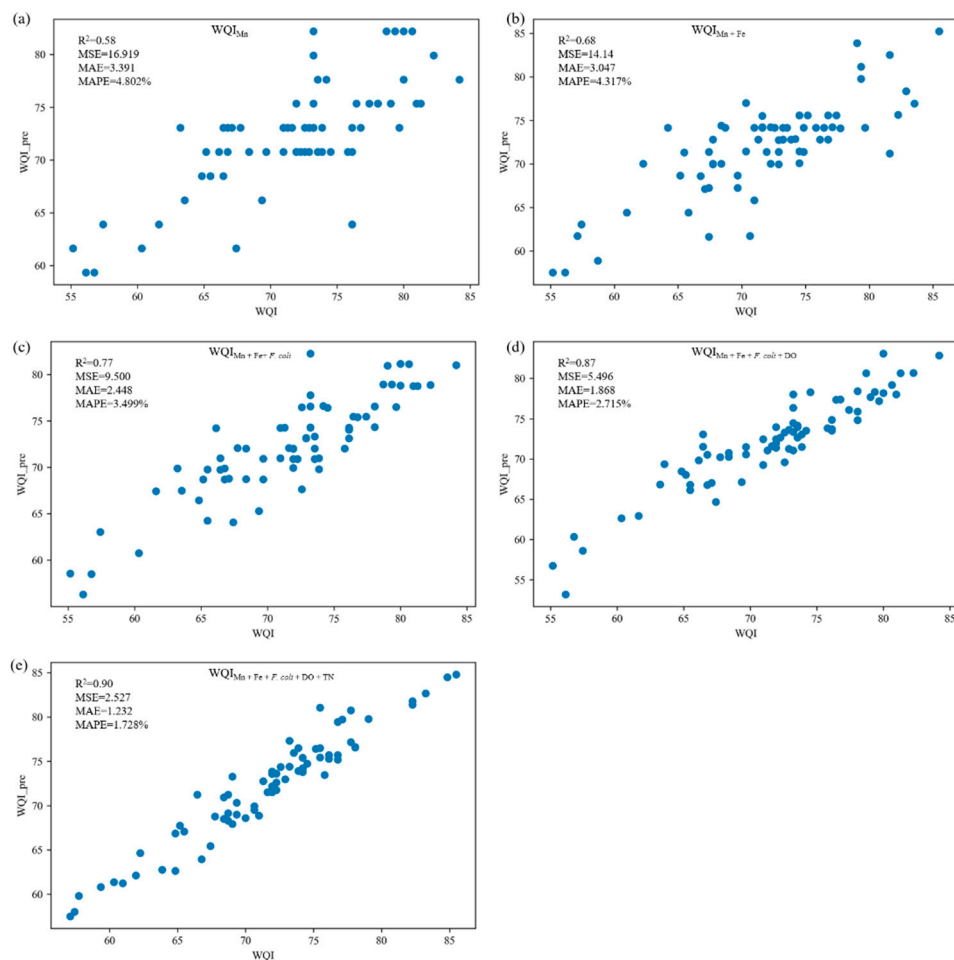

**Figure. S1.** Comparison of the WQI and  $WQI_{LRmin}$  values from the stepwise multiple linear regression based on the testing dataset

## References

1. Kocer, M.; Sevgili, H. Parameters selection for water quality index in the assessment of the environmental impacts of land-based trout farms. *Ecol Indic* 2014, 36, 672-681, doi:10.1016/j.ecolind.2013.09.034.
2. Wu, Z.S.; Wang, X.L.; Chen, Y.W.; Cai, Y.J.; Deng, J.C. Assessing river water quality using water quality index in Lake Taihu Basin, China. *Sci Total Environ* 2018, 612, 914-922, doi:10.1016/j.scitotenv.2017.08.293.

3. Nong, X.Z.; Shao, D.G.; Zhong, H.; Liang, J.K. Evaluation of water quality in the South-to-North Water Diversion Project of China using the water quality index (WQI) method. *Water Res* 2020, 178, doi:10.1016/j.watres.2020.115781.
4. Pak, H.Y.; Chuah, C.J.; Tan, M.L.; Yong, E.L.; Snyder, S.A. A framework for assessing the adequacy of Water Quality Index - Quantifying parameter sensitivity and uncertainties in missing values distribution. *Sci Total Environ* 2021, 751, doi:10.1016/j.scitotenv.2020.141982.
